# Supplementary material for: Mixed-diphosphine-protected chiral undecagold clusters Au11(S,S-DIOP)4(rac-/R-/S-BINAP): effect of the handedness of BINAP on their chiroptical responses
Source: Royal Society of Chemistry journal article supplement (doi:10.1039/d1cp02106k), 2021-01-01
Supplement: d1cp02106k1.pdf [file d1cp02106k1.pdf]

Electronic Supplementary Information (ESI) for *PCCP*

**Mixed-diphosphine-protected chiral undecagold clusters**  
 **$\text{Au}_{11}(\text{S,S-DIOP})_4(\text{rac-/R-/S-BINAP})$ : Effect of the handedness of BINAP**  
**on their chiroptical responses**

Yasuhiko Sato and Hiroshi Yao\*

*Division of Chemistry for Materials, Graduate School of Engineering, Mie University, 1577  
 Kurimamachiya-cho, Tsu, Mie 514-8507, Japan*

**Simple averages of absorption and CD spectra of isomers  $1_{\text{S}}\text{--}5_{\text{S}}$  or  $1_{\text{R}}\text{--}5_{\text{R}}$ .**

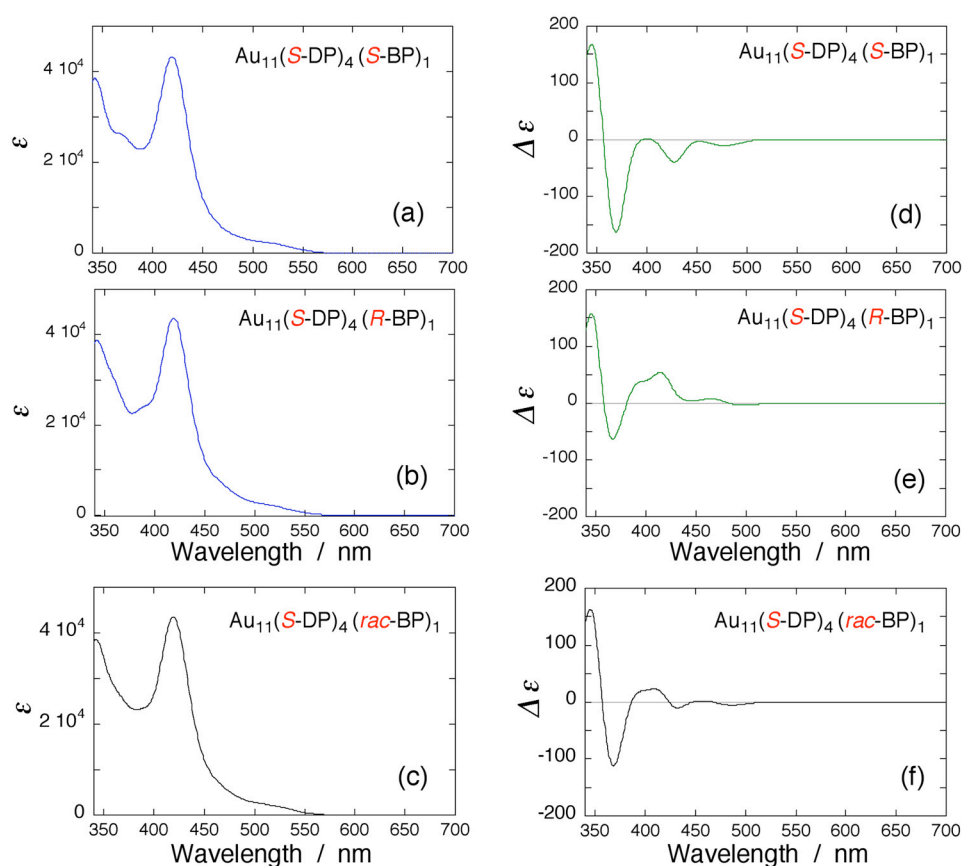

**Fig. S1.** Simple average of absorption ((a) or (b)) and CD spectra ((d) or (e)) of isomers  $1_{\text{S}}\text{--}5_{\text{S}}$  or  $1_{\text{R}}\text{--}5_{\text{R}}$ , respectively. (c) or (f) shows absorption or CD spectrum that can be obtained as a simple average of (a) and (b), or (d) and (e), respectively.
